# Supplementary material for: Effect of industrial processing and storage procedures on oxysterols in milk and milk products
Source: Royal Society of Chemistry journal article supplement (doi:10.1039/d0fo02462g), 2020-12-18

## Effect of industrial processing and storage procedures on oxysterols in milk and milk products

D. Risso,<sup>a\*</sup> V. Leoni,<sup>b\*</sup> C. Fania,<sup>b</sup> M. Arveda,<sup>a</sup> L. Falchero,<sup>a</sup> M. Barattero,<sup>c</sup> A. Civra,<sup>d</sup> D. Lembo,<sup>d</sup> G. Poli,<sup>d</sup> R. Menta<sup>a</sup>

<sup>a</sup> Soremartec Italia Srl, Ferrero Group, Alba (CN), Italy

<sup>b</sup> Laboratory of Clinical Chemistry, Hospital of Desio and Monza, ASST-Monza, School of Medicine and Surgery, University of Milano Bicocca, Italy

<sup>c</sup> Inalpi SpA, Via Cuneo, 38, 12033 Moretta (CN), Italy

<sup>d</sup> Department of Clinical and Biological Sciences, University of Torino, San Luigi Hospital, 10043, Orbassano, Torino, Italy

\*These authors equally contributed to the work

Corresponding author: Davide Risso, via P. Ferrero, 19 12051 Alba (CN), Italy, +390173313214, [davide.risso@ferrero.com](mailto:davide.risso@ferrero.com)

### Electronic Supplementary Information (ESI)

Table S1.

Qualifier and quantifier ions for the analytes and internal standards used in this study.

| Oxysterol        | M/z    | Ion fragment | RT    |
|------------------|--------|--------------|-------|
| d7-7 $\beta$ OHC | 463,00 | M+ -90       | 13.25 |
| 7 $\beta$ OHC    | 456,00 | M+ -90       | 13.32 |
| d7-7KC           | 479,00 | M+ -90       | 16.42 |
| 7KC              | 472,00 | M+ -90       | 16.51 |
| d6-27OHC         | 562,00 | M+ -90       | 17.45 |
| 27OHC            | 456,00 | M+ -90       | 17.52 |

Figure S1.

A total Ion Count (TIC) typical chromatogram of a raw milk sample analyzed as described in the materials and methods. (1) d7-7 $\beta$ OHC, (2) 7 $\beta$ OHC, (3) d7-7KC, (4) 7KC, (5) d6-27OHC, (6) 27OHC.

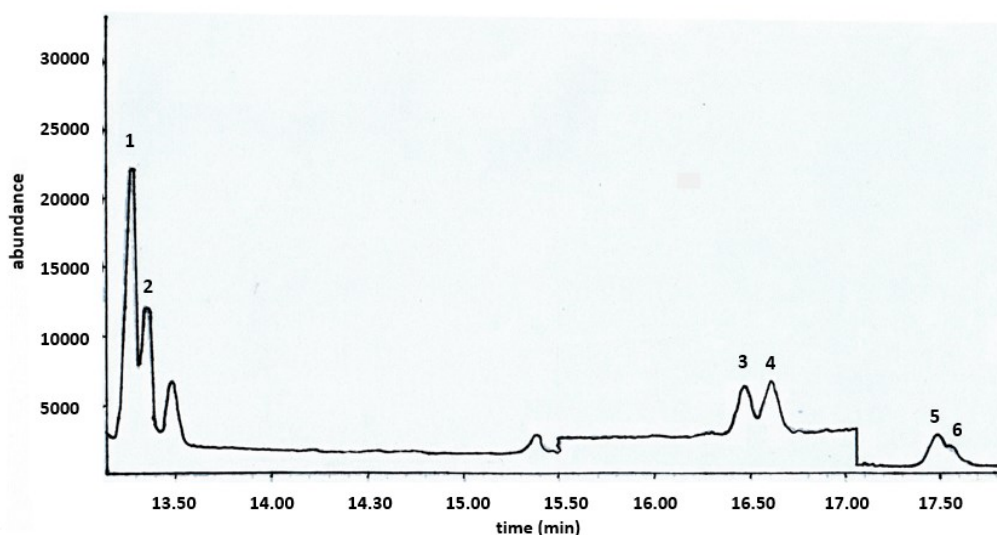

Supplement: d0fo02462g1.pdf [file d0fo02462g1.pdf]
